# Supplementary material for: A dextran–platinum(iv) conjugate as a reduction-responsive carrier for triggered drug release
Source: Royal Society of Chemistry journal article supplement (doi:10.1039/c5tb01496d), 2015-01-01
Supplement: c5tb01496d1.pdf [file c5tb01496d1.pdf]

## **Supporting Information**

### **Dextran–platinum(IV) conjugate as reduction-responsive carrier for triggered drug release**

*Shasha He, Yuwei Cong, Dongfang Zhou,\* Jizhen Li, Zhigang Xie, Xuesi Chen,  
Xiabin Jing and Yubin Huang*

### Synthesis of *c,c,t*-[Pt(NH<sub>3</sub>)<sub>2</sub>Cl<sub>2</sub>(OH)<sub>2</sub>]

Briefly, H<sub>2</sub>O<sub>2</sub> (5 mL) was added to a suspension of cisplatin (1 g) in H<sub>2</sub>O (5 mL), and the mixture was stirred at room temperature in dark for 4 h. Then the light yellow precipitate was collected and washed with water and acetone for several times, and dried (Scheme S1). <sup>1</sup>H NMR: (300 MHz, DMSO-d<sub>6</sub>, 25 °C): 5.2-5.8 (6H, m, NH<sub>3</sub>); IR: cm<sup>-1</sup> 3463 (br, OH), 538 (sh, Pt-OH). <sup>1</sup>H NMR: (300 MHz, d<sub>6</sub>-DMSO, 25 °C): δH 2.33-2.39 (4H, m, -OCH<sub>2</sub>CH<sub>2</sub>C-), 5.12-5.71 (6H, m, NH<sub>3</sub>) (Fig. 2A, Fig. S1).

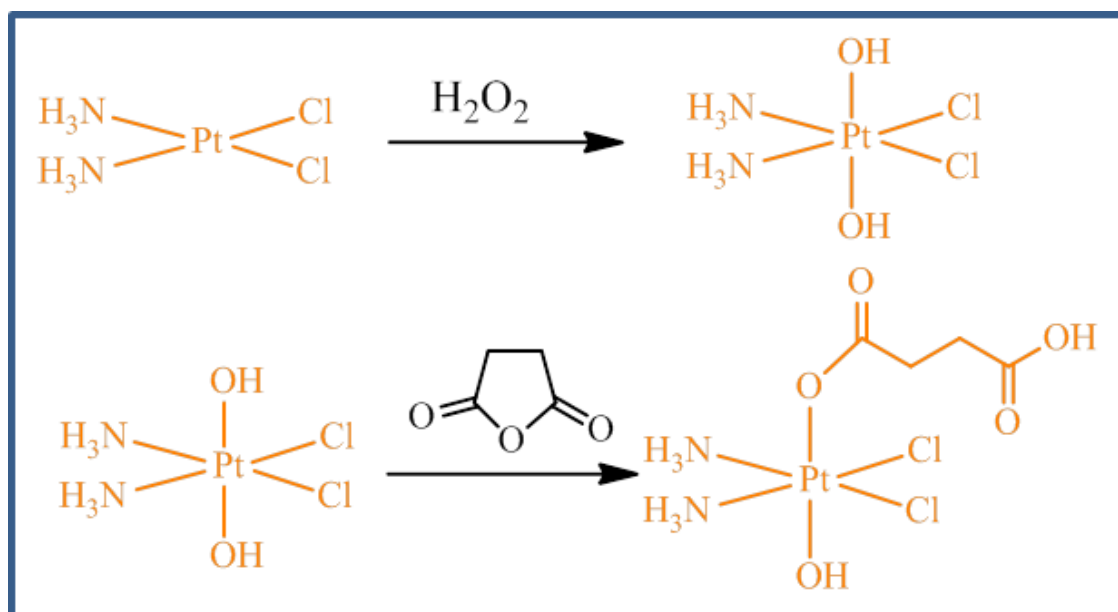

**Scheme S1** Synthesis of *c,c,t*-[Pt(NH<sub>3</sub>)<sub>2</sub>Cl<sub>2</sub>(OH)<sub>2</sub>] and Pt(IV).

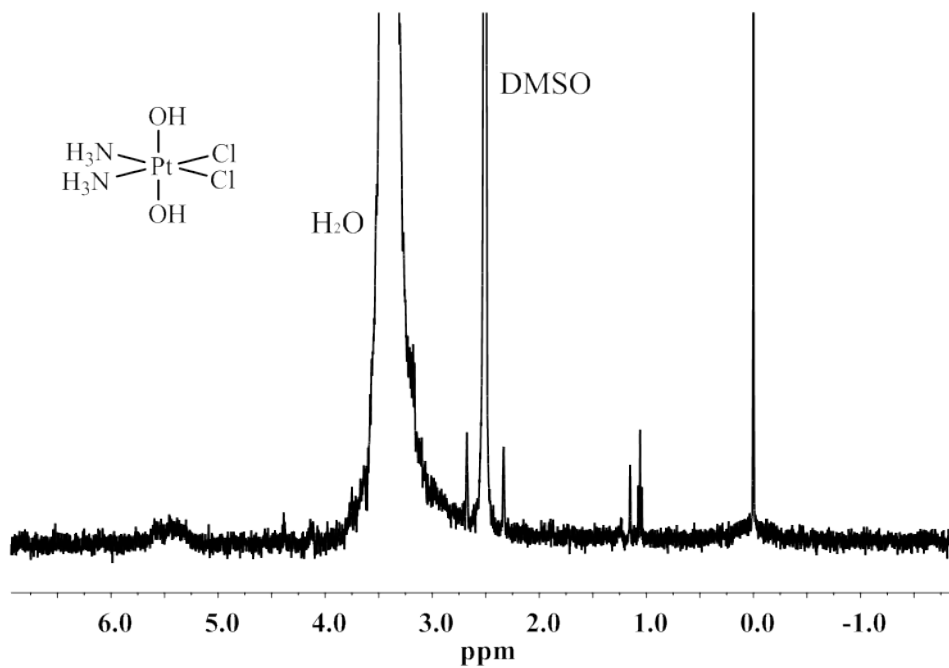

**Fig. S1** The <sup>1</sup>H NMR spectra of  $c,c,t$ -[Pt(NH<sub>3</sub>)<sub>2</sub>Cl<sub>2</sub>(OH)<sub>2</sub>].

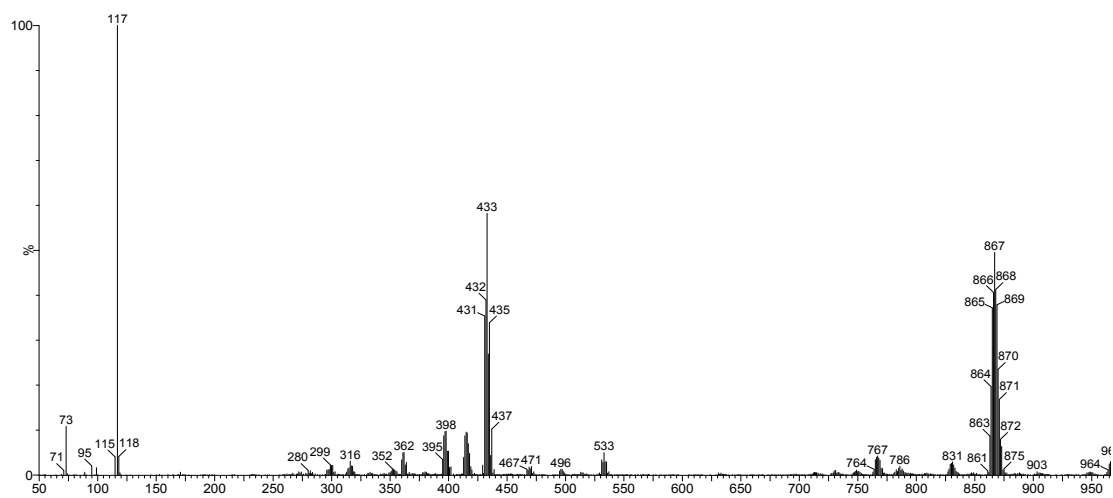

**Fig. S2** ESI-MS spectrum of Pt(IV).

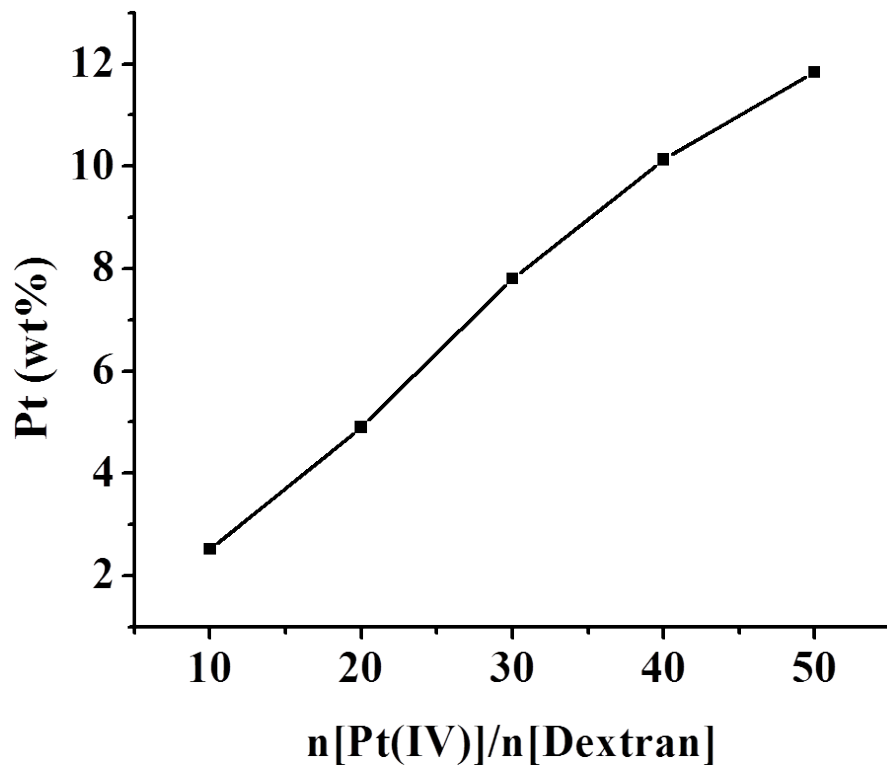

**Fig. S3** Platinum content of the synthesized Dextran–Pt(IV) conjugate as a function of the molar ratio of Pt(IV) to dextran.

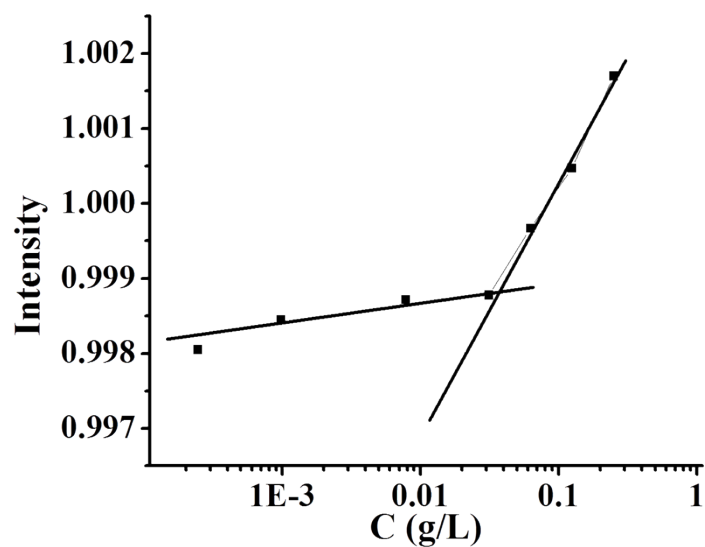

**Fig. S4** Intensity of pyrene excitation spectra vs. the logarithm of the concentration of Dextran–Pt(IV) conjugate in water.

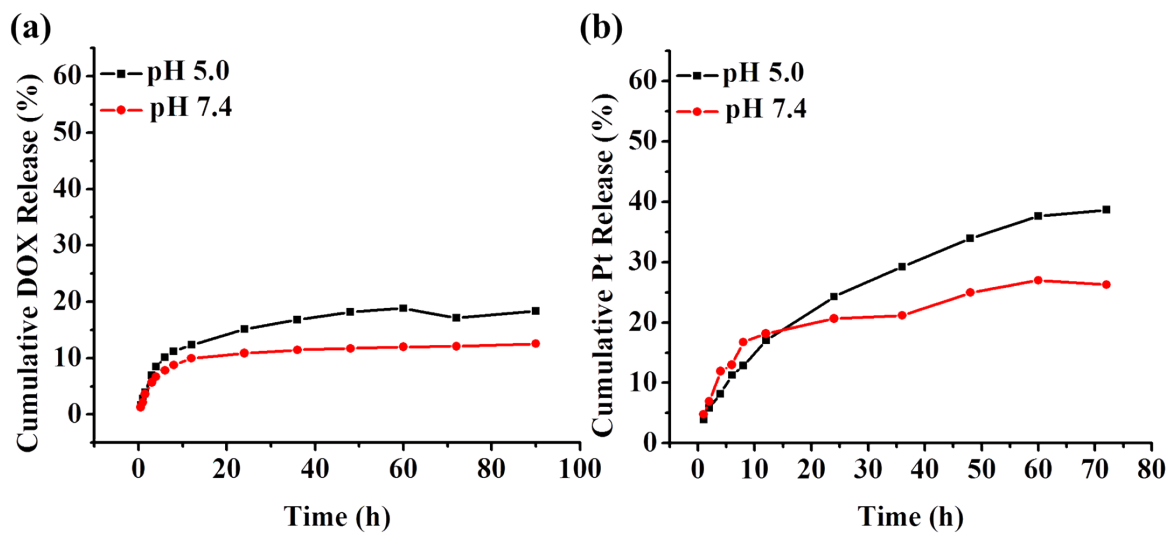

**Fig. S5** *In vitro* drug release profiles of DOX-loaded Dextran–Pt(IV) in PBS (pH 7.4) and acetate buffer solution (pH 5.0): (a) DOX release profiles; (b) Pt release profiles.
